# Supplementary material
Source: Research Square preprint supplement (doi:10.21203/rs.3.rs-9427619/v1)
Supplement: Supplementary file 1 [file 9d3725ccf30cb5126a6998d3.docx]

Appendix A: STROBE Compliance Checklist

The following table summarises compliance of this manuscript with the STROBE (Strengthening the Reporting of Observational Studies in Epidemiology) Statement for cross-sectional studies (von Elm et al., 2007).

**STROBE Compliance Summary — Cross-Sectional Study**

| **Item No.** | **STROBE Recommendation** | **Location in Manuscript** |
| --- | --- | --- |
| 1 | Title and abstract — indicate study design and provide an informative summary | Title; Abstract |
| 2 | Background / rationale — explain scientific background and study rationale | Introduction, ¶1–4 |
| 3 | Objectives — state specific objectives, including any pre-specified hypotheses | Introduction, final paragraph |
| 4 | Study design — present key elements of study design early in the paper | Methods: Study Design |
| 5 | Setting — describe setting, locations, and relevant dates (recruitment, exposure, follow-up, data collection) | Methods: Study Setting |
| 6 | Participants — give eligibility criteria, sources, and methods of selection | Methods: Participants |
| 7 | Variables — define all outcomes, exposures, predictors, potential confounders, and effect modifiers | Methods: Outcome and Exposure Measures |
| 8 | Data sources / measurement — describe data sources and methods of assessment for each variable | Methods: Data Collection Instrument |
| 9 | Bias — describe any efforts to address potential sources of bias | Methods: Validity, Reliability and Bias; Limitations |
| 10 | Study size — explain how the study size was arrived at | Methods: Sample Size |
| 11 | Statistical methods — describe all statistical methods, including those for controlling confounding | Methods: Statistical Analysis |
| 12 | Descriptive data — report characteristics of study participants and person-time of follow-up | Results: Participant Characteristics (Table 1) |
| 13 | Outcome data — report numbers of outcome events or summary measures | Results: Breastfeeding Practices (Table 3) |
| 14 | Main results — give unadjusted and adjusted estimates with precision | Results: Tables 2–5 |
| 15 | Other analyses — report other analyses done (sensitivity, subgroup, etc.) | Results: Correlation analyses (Tables 2, 4, 5) |
| 16 | Key results — summarise key results with reference to study objectives | Discussion: Key Findings |
| 17 | Limitations — discuss limitations, taking into account sources of potential bias | Discussion: Limitations |
| 18 | Interpretation — give cautious overall interpretation considering objectives, limitations, and multiplicity. | Discussion: Interpretation |
| 19 | Generalisability — discuss the generalisability (external validity) of study results | Discussion: Generalisability |
| 20 | Funding—give sources of funding and other support; role of funders | Funding / Conflict of Interest |

*Source:* [(Von Elm et al., 2007)](#von_elm)
